# Supplementary material for: Evaluation of the Diagnostic Potential of Recombinant Coxiella burnetii Com1 in an ELISA for the Diagnosis of Q Fever in Sheep, Goats and Cattle
Source: Microorganisms. 2020 Aug 13;8(8):1235. doi: 10.3390/microorganisms8081235 (PMC7465334; doi:10.3390/microorganisms8081235)
Supplement: Supplementary file 1 [file microorganisms-08-01235-s001.xlsx]

## Sheet: Tabelle1
serum sample number	species	OD in Com1 -ELISA	result Com1-ELISA	result commercial ELISA	result phase I antibodies	result phase II antibodies	location, year	region	origin			results for other bacteria	annotation
14QC1919	sheep	1.119	positive	positive	positive	positive	Location 1, 2014	Southern Germany	outbreak	true positive case	associated human cases	not tested
14QC1920	sheep	0.77	positive	positive	positive	positive	Location 1, 2014	Southern Germany	outbreak	true positive case	associated human cases	not tested
14QC1921	sheep	0.561	positive	positive	positive	positive	Location 1, 2014	Southern Germany	outbreak	true positive case	associated human cases	not tested
14QC1922	sheep	0.452	positive	positive	positive	positive	Location 1, 2014	Southern Germany	outbreak	true positive case	associated human cases	not tested
14QC1923	sheep	0.504	positive	positive	positive	positive	Location 1, 2014	Southern Germany	outbreak	true positive case	associated human cases	not tested
14QC1924	sheep	0.5095	positive	positive	positive	positive	Location 1, 2014	Southern Germany	outbreak	true positive case	associated human cases	not tested
14QC1925	sheep	0.5415	positive	positive	positive	negative	Location 1, 2014	Southern Germany	outbreak	true positive case	associated human cases	not tested
14QC1927	sheep	0.806	positive	uncertain	positive	positive	Location 1, 2014	Southern Germany	outbreak			not tested	excluded because of uncertain result in IDEXX
14QC1928	sheep	0.3405	positive	positive	positive	positive	Location 1, 2014	Southern Germany	outbreak	true positive case	associated human cases	not tested
14QC1929	sheep	0.6785	positive	positive	positive	positive	Location 1, 2014	Southern Germany	outbreak	true positive case	associated human cases	not tested
14QC1930	sheep	0.293	negative	positive	positive	positive	Location 1, 2014	Southern Germany	outbreak	true positive case	associated human cases	not tested
14QC1931	sheep	0.5935	positive	positive	positive	positive	Location 1, 2014	Southern Germany	outbreak	true positive case	associated human cases	not tested
14QC1932	sheep	1.2135	positive	positive	positive	positive	Location 1, 2014	Southern Germany	outbreak	true positive case	associated human cases	not tested
14QC1933	sheep	0.749	positive	positive	positive	positive	Location 1, 2014	Southern Germany	outbreak	true positive case	associated human cases	not tested
14QC1934	sheep	0.3495	positive	positive	negative	negative	Location 1, 2014	Southern Germany	outbreak	true positive case	associated human cases	not tested
14QC1935	sheep	0.562	positive	positive	positive	negative	Location 1, 2014	Southern Germany	outbreak	true positive case	associated human cases	not tested
14QC1936	sheep	0.5665	positive	positive	positive	positive	Location 1, 2014	Southern Germany	outbreak	true positive case	associated human cases	not tested
14QC1937	sheep	0.3655	positive	positive	positive	positive	Location 1, 2014	Southern Germany	outbreak	true positive case	associated human cases	not tested
14QC1938	sheep	0.4615	positive	positive	positive	positive	Location 1, 2014	Southern Germany	outbreak	true positive case	associated human cases	not tested
14QC1939	sheep	0.8495	positive	positive	positive	negative	Location 1, 2014	Southern Germany	outbreak	true positive case	associated human cases	not tested
14QC1940	sheep	0.3425	positive	positive	positive	positive	Location 1, 2014	Southern Germany	outbreak	true positive case	associated human cases	not tested
14QC1941	sheep	0.31	negative	negative	positive	uncertain	Location 1, 2014	Southern Germany	outbreak		associated human cases	not tested
14QC1942	sheep	0.52	positive	positive	positive	positive	Location 1, 2014	Southern Germany	outbreak	true positive case	associated human cases	not tested
14QC1943	sheep	0.667	positive	positive	positive	positive	Location 1, 2014	Southern Germany	outbreak	true positive case	associated human cases	not tested
14QC1944	sheep	0.459	positive	positive	positive	positive	Location 1, 2014	Southern Germany	outbreak	true positive case	associated human cases	not tested
14QC1945	sheep	0.685	positive	negative	positive	negative	Location 1, 2014	Southern Germany	outbreak		associated human cases	not tested
14QC1946	sheep	0.4515	positive	positive	positive	uncertain	Location 1, 2014	Southern Germany	outbreak	true positive case	associated human cases	not tested
14QC1947	sheep	0.345	positive	positive	positive	positive	Location 1, 2014	Southern Germany	outbreak	true positive case	associated human cases	not tested
14QC1948	sheep	0.344	positive	positive	positive	positive	Location 1, 2014	Southern Germany	outbreak	true positive case	associated human cases	not tested
14QC1949	sheep	0.6245	positive	positive	positive	positive	Location 1, 2014	Southern Germany	outbreak	true positive case	associated human cases	not tested
14QC1950	sheep	0.58	positive	uncertain	positive	negative	Location 1, 2014	Southern Germany	outbreak			not tested	excluded because of uncertain result in IDEXX
16G0169	sheep	0.4445	positive	negative	not tested	not tested	Location 2, 2016	unknown	National Reference Laboratory for Chlamydiosis			positive for Chlamyida spp.
16G0256	sheep	0.1225	negative	negative	not tested	not tested	Location 2, 2016	unknown	National Reference Laboratory for Chlamydiosis			positive for Chlamyida spp.
16G0257	sheep	0.183	negative	negative	not tested	not tested	Location 2, 2016	unknown	National Reference Laboratory for Chlamydiosis			positive for Chlamyida spp.
16G0259	sheep	0.1605	negative	negative	not tested	not tested	Location 2, 2016	unknown	National Reference Laboratory for Chlamydiosis			positive for Chlamyida spp.
16QC1491	sheep	0.1655	negative	negative	negative	negative	Location 3, 2016	Central Germany	apparently healthy flock			not tested
16QC1492	sheep	0.1015	negative	negative	negative	negative	Location 3, 2016	Central Germany	apparently healthy flock			not tested
16QC1493	sheep	0.17	negative	negative	negative	negative	Location 3, 2016	Central Germany	apparently healthy flock			not tested
16QC1494	sheep	0.1435	negative	negative	negative	negative	Location 3, 2016	Central Germany	apparently healthy flock			not tested
16QC1535	sheep	0.262	negative	negative	negative	negative	Location 4, 2016	Kosovo			associated human cases, qPCR negative	not tested
16QC1536	sheep	0.588	positive	positive	uncertain	positive	Location 4, 2016	Kosovo			associated human cases, qPCR negative	not tested
16QC1537	sheep	0.346	positive	negative	negative	negative	Location 4, 2016	Kosovo			associated human cases, qPCR negative	not tested
16QC1538	sheep	0.3175	negative	negative	uncertain	negative	Location 4, 2016	Kosovo			associated human cases, qPCR negative	not tested
16QC1539	sheep	0.373	positive	negative	negative	negative	Location 4, 2016	Kosovo			associated human cases, qPCR negative	not tested
16QC1540	sheep	0.21	negative	negative	negative	negative	Location 4, 2016	Kosovo			associated human cases, qPCR negative	not tested
16QC1541	sheep	0.1745	negative	negative	negative	negative	Location 4, 2016	Kosovo			associated human cases, qPCR negative	not tested
16QC1542	sheep	0.264	negative	negative	negative	negative	Location 4, 2016	Kosovo			associated human cases, qPCR negative	not tested
16QC1543	sheep	0.164	negative	negative	negative	negative	Location 4, 2016	Kosovo			associated human cases, qPCR negative	not tested
16QC1544	sheep	0.147	negative	negative	negative	negative	Location 4, 2016	Kosovo			associated human cases, qPCR negative	not tested
16QC1545	sheep	0.357	positive	positive	positive	positive	Location 5, 2016	Kosovo	outbreak	true positive case	associated human cases, qPCR negative	not tested
16QC1546	sheep	0.202	negative	positive	positive	positive	Location 5, 2016	Kosovo	outbreak	true positive case	associated human cases, qPCR negative	not tested
16QC1547	sheep	0.16	negative	positive	positive	uncertain	Location 5, 2016	Kosovo	outbreak	true positive case	associated human cases, qPCR positive	not tested
16QC1548	sheep	1.607	positive	positive	positive	positive	Location 5, 2016	Kosovo	outbreak	true positive case	associated human cases, qPCR negative	not tested
16QC1549	sheep	0.744	positive	positive	positive	positive	Location 5, 2016	Kosovo	outbreak	true positive case	associated human cases, qPCR negative	not tested
16QC1550	sheep	0.9	positive	positive	positive	positive	Location 5, 2016	Kosovo	outbreak	true positive case	associated human cases, qPCR negative	not tested
16QC1551	sheep	0.912	positive	positive	positive	negative	Location 5, 2016	Kosovo	outbreak	true positive case	associated human cases, qPCR positive	not tested
16QC1552	sheep	0.499	positive	positive	positive	positive	Location 5, 2016	Kosovo	outbreak	true positive case	associated human cases, qPCR negative	not tested
16QC1553	sheep	0.8525	positive	positive	positive	positive	Location 5, 2016	Kosovo	outbreak	true positive case	associated human cases, qPCR negative	not tested
16QC1554	sheep	0.444	positive	positive	positive	negative	Location 5, 2016	Kosovo	outbreak	true positive case	associated human cases, qPCR positive	not tested
16QC1580	sheep	0.394	positive	positive	positive	positive	Location 6, 2016	Southern Germany	outbreak	true positive case	associated human cases, qPCR positive	not tested
16QC1581	sheep	0.393	positive	positive	positive	positive	Location 6, 2016	Southern Germany	outbreak	true positive case	associated human cases, qPCR positive	not tested
16QC1582	sheep	0.173	negative	positive	negative	uncertain	Location 6, 2016	Southern Germany	outbreak	true positive case	associated human cases, qPCR positive	not tested
16QC1583	sheep	0.299	negative	negative	positive	positive	Location 6, 2016	Southern Germany	outbreak		associated human cases, qPCR positive	not tested
16QC1584	sheep	1.0365	positive	positive	positive	positive	Location 6, 2016	Southern Germany	outbreak	true positive case	associated human cases, qPCR positive	not tested
16QC1585	sheep	0.806	positive	positive	positive	positive	Location 6, 2016	Southern Germany	outbreak	true positive case	associated human cases, qPCR positive	not tested
16QC1587	sheep	0.392	positive	negative	negative	positive	Location 6, 2016	Southern Germany	outbreak		associated human cases, qPCR positive	not tested
16QC1588	sheep	0.1565	negative	positive	negative	positive	Location 6, 2016	Southern Germany	outbreak	true positive case		not tested	excluded because of lowest optical density of all positive sera
16QC1589	sheep	0.5425	positive	positive	positive	positive	Location 6, 2016	Southern Germany	outbreak	true positive case	associated human cases, qPCR positive	not tested
16QC1590	sheep	0.2135	negative	positive	positive	positive	Location 6, 2016	Southern Germany	outbreak	true positive case	associated human cases, qPCR positive	not tested
16QC1592	sheep	0.8045	positive	positive	negative	negative	Location 6, 2016	Southern Germany	outbreak	true positive case	associated human cases, qPCR positive	not tested
16QC1594	sheep	0.162	negative	positive	positive	uncertain	Location 6, 2016	Southern Germany	outbreak	true positive case	associated human cases, qPCR positive	not tested
16QC1595	sheep	0.296	negative	positive	positive	positive	Location 6, 2016	Southern Germany	outbreak	true positive case	associated human cases, qPCR positive	not tested
16QC1597	sheep	0.395	positive	positive	positive	positive	Location 6, 2016	Southern Germany	outbreak	true positive case	associated human cases, qPCR positive	not tested
16QC1598	sheep	1.8645	positive	positive	positive	positive	Location 6, 2016	Southern Germany	outbreak	true positive case	associated human cases, qPCR positive	not tested
16QC1601	sheep	1.1305	positive	positive	positive	positive	Location 6, 2016	Southern Germany	outbreak	true positive case	associated human cases, qPCR positive	not tested
16QC1602	sheep	0.1865	negative	positive	positive	positive	Location 6, 2016	Southern Germany	outbreak	true positive case	associated human cases, qPCR positive	not tested
17QC0185	sheep	0.498	positive	negative	negative	negative	Location 7, 2017	Northern Germany	apparently healthy flock			not tested
17QC0186	sheep	0.6915	positive	negative	negative	negative	Location 7, 2017	Northern Germany	apparently healthy flock			not tested
17QC0187	sheep	1.081	positive	negative	negative	negative	Location 7, 2017	Northern Germany	apparently healthy flock			not tested	excluded because of highest optical density of all negative sera
17QC0188	sheep	0.4	positive	negative	negative	negative	Location 7, 2017	Northern Germany	apparently healthy flock			not tested
17QC0189	sheep	0.671	positive	negative	negative	negative	Location 7, 2017	Northern Germany	apparently healthy flock			not tested
17QC0190	sheep	0.6855	positive	negative	negative	negative	Location 7, 2017	Northern Germany	apparently healthy flock			not tested
17QC0191	sheep	0.582	positive	negative	negative	negative	Location 7, 2017	Northern Germany	apparently healthy flock			not tested
17QC0192	sheep	0.1465	negative	negative	negative	negative	Location 7, 2017	Northern Germany	apparently healthy flock			not tested
17QC0193	sheep	0.409	positive	negative	negative	negative	Location 7, 2017	Northern Germany	apparently healthy flock			not tested
17QC0194	sheep	0.454	positive	negative	negative	negative	Location 7, 2017	Northern Germany	apparently healthy flock			not tested
17QC0195	sheep	0.386	positive	negative	negative	negative	Location 7, 2017	Northern Germany	apparently healthy flock			not tested
17QC0318	sheep	2.169	positive	positive	positive	positive	Location 8, 2017	Southern Germany	outbreak	true positive case	qPCR positive	not tested
17QC0319	sheep	0.2845	negative	positive	positive	uncertain	Location 8, 2017	Southern Germany	outbreak	true positive case	qPCR positive	not tested
17QC0320	sheep	0.163	negative	positive	positive	positive	Location 8, 2017	Southern Germany	outbreak	true positive case	qPCR positive	not tested
17QC0321	sheep	2.2495	positive	positive	positive	positive	Location 8, 2017	Southern Germany	outbreak	true positive case	qPCR positive	not tested
17QC0322	sheep	1.738	positive	positive	positive	positive	Location 8, 2017	Southern Germany	outbreak	true positive case	qPCR positive	not tested
17QC0323	sheep	0.568	positive	positive	positive	negative	Location 8, 2017	Southern Germany	outbreak	true positive case		not tested
17QC0324	sheep	0.3355	positive	positive	positive	positive	Location 8, 2017	Southern Germany	outbreak	true positive case		not tested
17QC0325	sheep	0.543	positive	positive	positive	positive	Location 8, 2017	Southern Germany	outbreak	true positive case		not tested
17QC0326	sheep	0.381	positive	positive	positive	positive	Location 8, 2017	Southern Germany	outbreak	true positive case		not tested
17QC0327	sheep	0.333	positive	positive	positive	negative	Location 8, 2017	Southern Germany	outbreak	true positive case		not tested
17QC0790	sheep	0.2295	negative	negative	negative	negative	Location 9, 2017	Central Germany	apparently healthy flock			not tested
17QC0791	sheep	0.2535	negative	negative	negative	negative	Location 9, 2017	Central Germany	apparently healthy flock			not tested
17QC0792	sheep	0.0985	negative	negative	negative	negative	Location 9, 2017	Central Germany	vaccinated healthy flock			not tested
17QC0793	sheep	0.162	negative	negative	negative	uncertain	Location 9, 2017	Central Germany	vaccinated healthy flock			not tested
17QC0794	sheep	0.1555	negative	negative	negative	positive	Location 9, 2017	Central Germany	vaccinated healthy flock			not tested
18QC0001	sheep	2.0955	positive	positive	positive	positive	Location 10, 2018	Central Germany				not tested
18QC0002	sheep	0.778	positive	positive	positive	positive	Location 10, 2018	Central Germany				not tested
19QC0081	sheep	0.4345	positive	negative	not tested	not tested	Location 11	New Zealand	commercial negative serum			not tested
19QC0300	sheep	0.217	negative	negative	not tested	not tested	Location 12, 2019	Central Germany	apparently healthy flock			not tested
19QC0301	sheep	0.1275	negative	negative	not tested	not tested	Location 12, 2019	Central Germany	apparently healthy flock			not tested
19QC0302	sheep	0.219	negative	negative	not tested	not tested	Location 12, 2019	Central Germany	apparently healthy flock			not tested
19QC0303	sheep	0.2985	negative	negative	not tested	not tested	Location 12, 2019	Central Germany	apparently healthy flock			not tested
19QC0348	sheep	0.196	negative	negative	not tested	not tested	Location 13, 2019	Central Germany	apparently healthy flock			not tested
19QC0349	sheep	0.153	negative	negative	not tested	not tested	Location 13, 2019	Central Germany	apparently healthy flock			not tested
19QC0350	sheep	0.1575	negative	negative	not tested	not tested	Location 13, 2019	Central Germany	apparently healthy flock			not tested
19QC0351	sheep	0.1775	negative	negative	not tested	not tested	Location 13, 2019	Central Germany	apparently healthy flock			not tested
19QC0352	sheep	0.1825	negative	negative	not tested	not tested	Location 13, 2019	Central Germany	apparently healthy flock			not tested
19QC0353	sheep	0.112167	negative	negative	not tested	not tested	Location 13, 2019	Central Germany	apparently healthy flock			not tested
19QC0304	goat	0.292	positive	negative	not tested	not tested	Location 12, 2019	Central Germany	apparently healthy herd			not tested
19QC0305	goat	0.168	negative	negative	not tested	not tested	Location 12, 2019	Central Germany	apparently healthy herd			not tested
19QC0306	goat	0.109	negative	negative	not tested	not tested	Location 12, 2019	Central Germany	apparently healthy herd			not tested
19QC0354	goat	0.1865	negative	negative	not tested	not tested	Location 13, 2019	Central Germany	apparently healthy herd			not tested
19QC0355	goat	0.293	positive	negative	not tested	not tested	Location 13, 2019	Central Germany	apparently healthy herd			not tested
19QC0356	goat	0.122	negative	negative	not tested	not tested	Location 13, 2019	Central Germany	apparently healthy herd			not tested
19QC0357	goat	0.2135	negative	negative	not tested	not tested	Location 13, 2019	Central Germany	apparently healthy herd			not tested
19QC0358	goat	0.193	negative	negative	not tested	not tested	Location 13, 2019	Central Germany	apparently healthy herd			not tested
19QC0359	goat	0.1685	negative	negative	not tested	not tested	Location 13, 2019	Central Germany	apparently healthy herd			not tested
19QC0360	goat	0.0783333	negative	negative	not tested	not tested	Location 13, 2019	Central Germany	apparently healthy herd			not tested
19QC0361	goat	0.1755	negative	negative	not tested	not tested	Location 13, 2019	Central Germany	apparently healthy herd			not tested
19QC0159	goat	0.187	negative	negative	not tested	not tested	Location 14, 2019	Central Germany	apparently healthy herd, National Reference Laboratory for Paratuberculosis			negative for M. avium ssp. Paratuberculosis
19QC0160	goat	0.3155	positive	negative	not tested	not tested	Location 14, 2019	Central Germany	apparently healthy herd, National Reference Laboratory for Paratuberculosis			negative for M. avium ssp. paratuberculosis
19QC0161	goat	0.122	negative	negative	not tested	not tested	Location 14, 2019	Central Germany	apparently healthy herd, National Reference Laboratory for Paratuberculosis			negative for M. avium ssp. paratuberculosis
19QC0162	goat	0.137	negative	negative	not tested	not tested	Location 14, 2019	Central Germany	apparently healthy herd, National Reference Laboratory for Paratuberculosis			negative for M. avium ssp. paratuberculosis
19QC0163	goat	0.1675	negative	negative	not tested	not tested	Location 14, 2019	Central Germany	apparently healthy herd, National Reference Laboratory for Paratuberculosis			negative for M. avium ssp. paratuberculosis
19QC0164	goat	0.1515	negative	negative	not tested	not tested	Location 14, 2019	Central Germany	apparently healthy herd, National Reference Laboratory for Paratuberculosis			negative for M. avium ssp. paratuberculosis
19QC0165	goat	0.177	negative	negative	not tested	not tested	Location 14, 2019	Central Germany	apparently healthy herd, National Reference Laboratory for Paratuberculosis			negative for M. avium ssp. paratuberculosis
19QC0166	goat	0.1555	negative	negative	not tested	not tested	Location 14, 2019	Central Germany	apparently healthy herd, National Reference Laboratory for Paratuberculosis			negative for M. avium ssp. paratuberculosis
19QC0167	goat	0.239	positive	negative	not tested	not tested	Location 14, 2019	Central Germany	apparently healthy herd, National Reference Laboratory for Paratuberculosis			negative for M. avium ssp. paratuberculosis
19QC0168	goat	0.3485	positive	negative	not tested	not tested	Location 14, 2019	Central Germany	apparently healthy herd, National Reference Laboratory for Paratuberculosis			negative for M. avium ssp. paratuberculosis
19QC0169	goat	0.129	negative	negative	not tested	not tested	Location 14, 2019	Central Germany	apparently healthy herd, National Reference Laboratory for Paratuberculosis			negative for M. avium ssp. paratuberculosis
19QC0170	goat	0.2805	positive	negative	not tested	not tested	Location 14, 2019	Central Germany	apparently healthy herd, National Reference Laboratory for Paratuberculosis			negative for M. avium ssp. paratuberculosis
19QC0171	goat	0.1625	negative	negative	not tested	not tested	Location 14, 2019	Central Germany	apparently healthy herd, National Reference Laboratory for Paratuberculosis			negative for M. avium ssp. paratuberculosis
19QC0172	goat	0.2695	positive	negative	not tested	not tested	Location 14, 2019	Central Germany	apparently healthy herd, National Reference Laboratory for Paratuberculosis			negative for M. avium ssp. paratuberculosis
19QC0173	goat	0.432	positive	negative	not tested	not tested	Location 14, 2019	Central Germany	apparently healthy herd, National Reference Laboratory for Paratuberculosis			negative for M. avium ssp. paratuberculosis
19QC0174	goat	0.206	negative	negative	not tested	not tested	Location 14, 2019	Central Germany	apparently healthy herd, National Reference Laboratory for Paratuberculosis			negative for M. avium ssp. paratuberculosis
19QC0175	goat	0.1845	negative	negative	not tested	not tested	Location 14, 2019	Central Germany	apparently healthy herd, National Reference Laboratory for Paratuberculosis			negative for M. avium ssp. paratuberculosis
19QC0176	goat	0.3255	positive	negative	not tested	not tested	Location 14, 2019	Central Germany	apparently healthy herd, National Reference Laboratory for Paratuberculosis			negative for M. avium ssp. paratuberculosis
19QC0177	goat	0.143	negative	negative	not tested	not tested	Location 14, 2019	Central Germany	apparently healthy herd, National Reference Laboratory for Paratuberculosis			negative for M. avium ssp. paratuberculosis
19QC0178	goat	0.0995	negative	negative	not tested	not tested	Location 14, 2019	Central Germany	apparently healthy herd, National Reference Laboratory for Paratuberculosis			negative for M. avium ssp. paratuberculosis
19QC0179	goat	0.167	negative	negative	not tested	not tested	Location 14, 2019	Central Germany	apparently healthy herd, National Reference Laboratory for Paratuberculosis			negative for M. avium ssp. paratuberculosis
19QC0180	goat	0.2485	positive	negative	not tested	not tested	Location 14, 2019	Central Germany	apparently healthy herd, National Reference Laboratory for Paratuberculosis			negative for M. avium ssp. paratuberculosis
19QC0181	goat	0.1775	negative	negative	not tested	not tested	Location 14, 2019	Central Germany	apparently healthy herd, National Reference Laboratory for Paratuberculosis			negative for M. avium ssp. paratuberculosis
19QC0182	goat	0.1445	negative	negative	not tested	not tested	Location 14, 2019	Central Germany	apparently healthy herd, National Reference Laboratory for Paratuberculosis			negative for M. avium ssp. paratuberculosis
19QC0183	goat	0.1645	negative	negative	not tested	not tested	Location 14, 2019	Central Germany	apparently healthy herd, National Reference Laboratory for Paratuberculosis			negative for M. avium ssp. paratuberculosis
19QC0184	goat	0.126	negative	negative	not tested	not tested	Location 14, 2019	Central Germany	apparently healthy herd, National Reference Laboratory for Paratuberculosis			negative for M. avium ssp. paratuberculosis
19QC0185	goat	0.098	negative	negative	not tested	not tested	Location 14, 2019	Central Germany	apparently healthy herd, National Reference Laboratory for Paratuberculosis			negative for M. avium ssp. paratuberculosis
19QC0186	goat	0.143	negative	negative	not tested	not tested	Location 14, 2019	Central Germany	apparently healthy herd, National Reference Laboratory for Paratuberculosis			negative for M. avium ssp. paratuberculosis
19QC0187	goat	0.117	negative	negative	not tested	not tested	Location 14, 2019	Central Germany	apparently healthy herd, National Reference Laboratory for Paratuberculosis			negative for M. avium ssp. paratuberculosis
19QC0188	goat	0.1795	negative	negative	not tested	not tested	Location 14, 2019	Central Germany	apparently healthy herd, National Reference Laboratory for Paratuberculosis			negative for M. avium ssp. paratuberculosis
19QC0189	goat	0.164	negative	negative	not tested	not tested	Location 14, 2019	Central Germany	apparently healthy herd, National Reference Laboratory for Paratuberculosis			negative for M. avium ssp. paratuberculosis
19QC0190	goat	0.1345	negative	negative	not tested	not tested	Location 14, 2019	Central Germany	apparently healthy herd, National Reference Laboratory for Paratuberculosis			negative for M. avium ssp. paratuberculosis
09RB5302	goat	0.868	positive	negative	not tested	not tested	Location 15, 2012	unknown	National Reference Laboratories for Brucella spec. Infections			positive for Brucella abortusor Brucella melitensis	excluded because of highest optical density of all negative sera
12RB0284	goat	0.341	positive	negative	not tested	not tested	Location 15, 2012	unknown	National Reference Laboratories for Brucella spec. Infections			positive for Brucella abortusor Brucella melitensis
12RB0310	goat	0.3875	positive	uncertain	uncertain	uncertain	Location 15, 2012	unknown	National Reference Laboratories for Brucella spec. Infections			positive for Brucella abortusor Brucella melitensis	excluded because of uncertain result in IDEXX
17QC0727	goat	0.0865	negative	negative	negative	negative	Location 16, 2017	Netherlands	animal experiment (Roest HI, Post J, van Gelderen B, van Zijderveld FG, Rebel JM. Q fever in pregnant goats: humoral and cellular immune responses. Vet Res. 2013)		qPCR negative	not tested
17QC0728	goat	0.081	negative	uncertain	negative	positive	Location 16, 2017	Netherlands	animal experiment (Roest HI, Post J, van Gelderen B, van Zijderveld FG, Rebel JM. Q fever in pregnant goats: humoral and cellular immune responses. Vet Res. 2013)			not tested	excluded because of uncertain result in IDEXX
17QC0729	goat	1.6995	positive	positive	positive	positive	Location 16, 2017	Netherlands	animal experiment (Roest HI, Post J, van Gelderen B, van Zijderveld FG, Rebel JM. Q fever in pregnant goats: humoral and cellular immune responses. Vet Res. 2013)	true positive case	qPCR positive	not tested
17QC0730	goat	2.09	positive	positive	positive	positive	Location 16, 2017	Netherlands	animal experiment (Roest HI, Post J, van Gelderen B, van Zijderveld FG, Rebel JM. Q fever in pregnant goats: humoral and cellular immune responses. Vet Res. 2013)	true positive case	qPCR positive	not tested
17QC0731	goat	0.1085	negative	negative	negative	negative	Location 16, 2017	Netherlands	animal experiment (Roest HI, Post J, van Gelderen B, van Zijderveld FG, Rebel JM. Q fever in pregnant goats: humoral and cellular immune responses. Vet Res. 2013)		qPCR positive	not tested
17QC0732	goat	0.093	negative	positive	negative	positive	Location 16, 2017	Netherlands	animal experiment (Roest HI, Post J, van Gelderen B, van Zijderveld FG, Rebel JM. Q fever in pregnant goats: humoral and cellular immune responses. Vet Res. 2013)	true positive case		not tested	excluded because of lowest optical density of all positive sera
17QC0733	goat	1.2395	positive	positive	negative	positive	Location 16, 2017	Netherlands	animal experiment (Roest HI, Post J, van Gelderen B, van Zijderveld FG, Rebel JM. Q fever in pregnant goats: humoral and cellular immune responses. Vet Res. 2013)	true positive case	qPCR positive	not tested
17QC0734	goat	1.3105	positive	positive	positive	positive	Location 16, 2017	Netherlands	animal experiment (Roest HI, Post J, van Gelderen B, van Zijderveld FG, Rebel JM. Q fever in pregnant goats: humoral and cellular immune responses. Vet Res. 2013)	true positive case	qPCR positive	not tested
16QC1486	goat	0.1145	negative	negative	negative	negative	Location 17, 2016	Central Germany	apparently healthy herd			not tested
16QC1487	goat	0.103	negative	negative	negative	negative	Location 17, 2016	Central Germany	apparently healthy herd			not tested
16QC1488	goat	0.092	negative	negative	negative	negative	Location 17, 2016	Central Germany	apparently healthy herd			not tested
16QC1489	goat	0.111	negative	negative	negative	negative	Location 17, 2016	Central Germany	apparently healthy herd			not tested
16QC1490	goat	0.0605	negative	negative	negative	negative	Location 17, 2016	Central Germany	apparently healthy herd			not tested
17QC0739	goat	0.087	negative	negative	negative	negative	Location 18, 2017	Central Germany	apparently healthy herd		qPCR negative	not tested
17QC0740	goat	0.1605	negative	negative	negative	negative	Location 18, 2017	Central Germany	apparently healthy herd		qPCR negative	not tested
17QC0741	goat	0.2495	positive	negative	negative	negative	Location 18, 2017	Central Germany	apparently healthy herd		qPCR negative	not tested
17QC0742	goat	0.091	negative	negative	negative	negative	Location 18, 2017	Central Germany	apparently healthy herd		qPCR negative	not tested
17QC0743	goat	0.205	negative	negative	negative	negative	Location 18, 2017	Central Germany	apparently healthy herd		qPCR negative	not tested
17QC0744	goat	0.2305	positive	negative	negative	negative	Location 18, 2017	Central Germany	apparently healthy herd		qPCR negative	not tested
17QC0745	goat	0.1155	negative	negative	negative	negative	Location 18, 2017	Central Germany	apparently healthy herd		qPCR negative	not tested
17QC0746	goat	0.0935	negative	negative	negative	negative	Location 18, 2017	Central Germany	apparently healthy herd		qPCR negative	not tested
17QC0747	goat	0.2115	negative	negative	negative	negative	Location 18, 2017	Central Germany	apparently healthy herd		qPCR negative	not tested
17QC0748	goat	0.1455	negative	negative	negative	negative	Location 18, 2017	Central Germany	apparently healthy herd		qPCR negative	not tested
081013MJ9061	goat	0.1215	negative	negative	not tested	not tested	Location 19, 2014	unknown	National Reference Laboratory for Paratuberculosis			positive for M. avium ssp. paratuberculosis
120314MJ9783	goat	0.128	negative	negative	not tested	not tested	Location 19, 2014	unknown	National Reference Laboratory for Paratuberculosis			positive for M. avium ssp. paratuberculosis
120314MJ9785	goat	0.301	positive	negative	not tested	not tested	Location 19, 2014	unknown	National Reference Laboratory for Paratuberculosis			positive for M. avium ssp. paratuberculosis
190314MJ9799	goat	0.216	negative	negative	not tested	not tested	Location 19, 2014	unknown	National Reference Laboratory for Paratuberculosis			positive for M. avium ssp. paratuberculosis
240314MJ9807	goat	0.088	negative	negative	not tested	not tested	Location 19, 2014	unknown	National Reference Laboratory for Paratuberculosis			positive for M. avium ssp. paratuberculosis
240913MJ8991	goat	0.132	negative	negative	not tested	not tested	Location 19, 2014	unknown	National Reference Laboratory for Paratuberculosis			positive for M. avium ssp. paratuberculosis
240913MJ8995	goat	0.071	negative	negative	not tested	not tested	Location 19, 2014	unknown	National Reference Laboratory for Paratuberculosis			positive for M. avium ssp. paratuberculosis
260314MJ9809	goat	0.2055	negative	negative	not tested	not tested	Location 19, 2014	unknown	National Reference Laboratory for Paratuberculosis			positive for M. avium ssp. paratuberculosis
260314MJ9811	goat	0.119	negative	negative	not tested	not tested	Location 19, 2014	unknown	National Reference Laboratory for Paratuberculosis			positive for M. avium ssp. paratuberculosis
40314MJ9805	goat	0.1315	negative	negative	not tested	not tested	Location 19, 2014	unknown	National Reference Laboratory for Paratuberculosis			positive for M. avium ssp. paratuberculosis
16QC0780	goat	0.7	positive	negative	negative	negative	Location 20, 2016	Northern Germany	apparently healthy herd			not tested
16QC0781	goat	0.6995	positive	negative	negative	negative	Location 20, 2016	Northern Germany	apparently healthy herd			not tested
16QC0782	goat	0.1165	negative	negative	negative	negative	Location 20, 2016	Northern Germany	apparently healthy herd			not tested
16QC0783	goat	0.236	positive	negative	negative	negative	Location 20, 2016	Northern Germany	apparently healthy herd			not tested
16QC0784	goat	0.1315	negative	negative	negative	negative	Location 20, 2016	Northern Germany	apparently healthy herd			not tested
16QC0804	goat	0.3075	positive	negative	negative	negative	Location 20, 2016	Northern Germany	apparently healthy herd			not tested
16QC0805	goat	0.27	positive	negative	negative	negative	Location 20, 2016	Northern Germany	apparently healthy herd			not tested
16QC0806	goat	0.0895	negative	negative	negative	negative	Location 20, 2016	Northern Germany	apparently healthy herd			not tested
16QC0815	goat	0.1115	negative	negative	negative	negative	Location 20, 2016	Northern Germany	apparently healthy herd			not tested
16QC0816	goat	0.0865	negative	negative	negative	negative	Location 20, 2016	Northern Germany	apparently healthy herd			not tested
16QC0819	goat	0.3015	positive	positive	positive	positive	Location 21, 2016	Northern Germany	monitoring			not tested
16QC0820	goat	0.4465	positive	positive	positive	negative	Location 21, 2016	Northern Germany	monitoring			not tested
16QC0821	goat	0.4425	positive	positive	positive	positive	Location 21, 2016	Northern Germany	monitoring			not tested
16QC0822	goat	0.195	negative	positive	positive	negative	Location 21, 2016	Northern Germany	monitoring			not tested
16QC0823	goat	0.222	positive	positive	positive	positive	Location 21, 2016	Northern Germany	monitoring			not tested
16QC0824	goat	0.7665	positive	positive	positive	positive	Location 21, 2016	Northern Germany	monitoring			not tested
16QC0828	goat	0.5685	positive	positive	positive	negative	Location 21, 2016	Northern Germany	monitoring			not tested
16QC0829	goat	0.2305	positive	positive	positive	positive	Location 21, 2016	Northern Germany	monitoring			not tested
16QC0831	goat	0.581	positive	positive	positive	positive	Location 21, 2016	Northern Germany	monitoring			not tested
16QC1586	goat	0.2315	positive	positive	positive	negative	Location 6, 2016	Southern Germany	outbreak	true positive case	associated human cases, qPCR positive	not tested
16QC1591	goat	0.396	positive	positive	positive	positive	Location 6, 2016	Southern Germany	outbreak	true positive case	associated human cases, qPCR positive	not tested
16QC1593	goat	0.157	negative	positive	uncertain	positive	Location 6, 2016	Southern Germany	outbreak	true positive case	associated human cases, qPCR positive	not tested
16QC1596	goat	0.3295	positive	positive	positive	positive	Location 6, 2016	Southern Germany	outbreak	true positive case	associated human cases, qPCR positive	not tested
16QC1599	goat	2.0235	positive	positive	positive	positive	Location 6, 2016	Southern Germany	outbreak	true positive case	associated human cases, qPCR positive	not tested
16QC1600	goat	0.7315	positive	positive	positive	positive	Location 6, 2016	Southern Germany	outbreak	true positive case	associated human cases, qPCR positive	not tested
08RB2470	cattle	0.2175	positive	negative	not tested	not tested	Location 15, 2012	unknown	National Reference Laboratories for Brucella spec. Infections			positive for Brucella abortusor Brucella melitensis
12RB0280	cattle	0.143	negative	negative	not tested	not tested	Location 15, 2012	unknown	National Reference Laboratories for Brucella spec. Infections			positive for Brucella abortusor Brucella melitensis
14E1731	cattle	0.111	negative	negative	negative	negative	Location 25, 2018	unknown	apparently healthy herd			not tested
14E1732	cattle	0.1715	negative	negative	negative	negative	Location 25, 2018	unknown	apparently healthy herd			not tested
14E1734	cattle	0.114	negative	negative	negative	negative	Location 25, 2018	unknown	apparently healthy herd			not tested
14E1736	cattle	0.1755	negative	negative	negative	negative	Location 25, 2018	unknown	apparently healthy herd			not tested
14E1738	cattle	0.1	negative	negative	negative	negative	Location 25, 2018	unknown	apparently healthy herd			not tested
14E1740	cattle	0.1785	negative	negative	negative	negative	Location 25, 2018	unknown	apparently healthy herd			not tested
14E1742	cattle	0.1305	negative	negative	negative	negative	Location 25, 2018	unknown	apparently healthy herd			not tested
14E1744	cattle	0.213	positive	negative	negative	negative	Location 25, 2018	unknown	apparently healthy herd			not tested
14E1746	cattle	0.1735	negative	negative	negative	negative	Location 25, 2018	unknown	apparently healthy herd			not tested
14E1749	cattle	0.113	negative	negative	negative	negative	Location 25, 2018	unknown	apparently healthy herd			not tested
14E1751	cattle	0.2575	positive	negative	negative	negative	Location 25, 2018	unknown	apparently healthy herd			not tested
14E1753	cattle	0.228	positive	negative	negative	negative	Location 25, 2018	unknown	apparently healthy herd			not tested
14E1755	cattle	0.1615	negative	negative	negative	negative	Location 25, 2018	unknown	apparently healthy herd			not tested
14E1757	cattle	0.1315	negative	negative	negative	negative	Location 25, 2018	unknown	apparently healthy herd			not tested
14E1759	cattle	0.197	positive	negative	negative	negative	Location 25, 2018	unknown	apparently healthy herd			not tested
14E1761	cattle	0.1615	negative	negative	negative	negative	Location 25, 2018	unknown	apparently healthy herd			not tested
14E1763	cattle	0.229	positive	negative	negative	negative	Location 25, 2018	unknown	apparently healthy herd			not tested
14E1765	cattle	0.158	negative	negative	negative	negative	Location 25, 2018	unknown	apparently healthy herd			not tested
14E1766	cattle	0.163	negative	negative	negative	negative	Location 25, 2018	unknown	apparently healthy herd			not tested
14E1768	cattle	0.1585	negative	negative	negative	negative	Location 25, 2018	unknown	apparently healthy herd			not tested
14E1770	cattle	0.127	negative	negative	negative	negative	Location 25, 2018	unknown	apparently healthy herd			not tested
14E1772	cattle	0.152	negative	negative	negative	negative	Location 25, 2018	unknown	apparently healthy herd			not tested
14E1774	cattle	0.171	negative	negative	negative	negative	Location 25, 2018	unknown	apparently healthy herd			not tested
14E1776	cattle	0.199	positive	negative	negative	negative	Location 25, 2018	unknown	apparently healthy herd			not tested
16G0236	cattle	0.2435	positive	negative	not tested	not tested	Location 32	unknown	National Reference Laboratory for Chlamydiosis			positive for C. pecorum
16G2679	cattle	0.1545	negative	uncertain	negative	negative	Location 32	unknown	National Reference Laboratory for Chlamydiosis			positive for C. pecorum	excluded because of uncertain result in IDEXX
16G2680	cattle	0.2135	positive	negative	not tested	not tested	Location 32	unknown	National Reference Laboratory for Chlamydiosis			positive for C. pecorum
0094 +10	cattle	0.1415	negative	positive	positive	negative	Location 22	unknown	National Reference Laboratory for Chlamydiosis			positive for C. psittaci
0094 +14	cattle	0.133	negative	uncertain	positive	negative	Location 22	unknown	National Reference Laboratory for Chlamydiosis			positive for C. psittaci	excluded because of uncertain result in IDEXX
0096 +14	cattle	0.0975	positive	negative	negative	negative	Location 22	unknown	National Reference Laboratory for Chlamydiosis			positive for C. psittaci
0103 +10	cattle	0.123	negative	negative	negative	negative	Location 22	unknown	National Reference Laboratory for Chlamydiosis			positive for C. psittaci
0103 +14	cattle	0.1595	negative	negative	negative	negative	Location 22	unknown	National Reference Laboratory for Chlamydiosis			positive for C. psittaci
0106 +10	cattle	0.181	positive	positive	positive	uncertain	Location 22	unknown	National Reference Laboratory for Chlamydiosis			positive for C. psittaci
0106 +14	cattle	0.196	positive	positive	positive	uncertain	Location 22	unknown	National Reference Laboratory for Chlamydiosis			positive for C. psittaci
0116 +10	cattle	0.1545	negative	negative	negative	negative	Location 22	unknown	National Reference Laboratory for Chlamydiosis			positive for C. psittaci
0116 +14	cattle	0.1465	negative	negative	negative	negative	Location 22	unknown	National Reference Laboratory for Chlamydiosis			positive for C. psittaci
0117 +10	cattle	0.2105	positive	negative	negative	negative	Location 22	unknown	National Reference Laboratory for Chlamydiosis			positive for C. psittaci
0117 +14	cattle	0.2545	positive	positive	negative	negative	Location 22	unknown	National Reference Laboratory for Chlamydiosis			positive for C. psittaci
0172 +14	cattle	0.2055	positive	negative	negative	negative	Location 22	unknown	National Reference Laboratory for Chlamydiosis			positive for C. psittaci
1516 S+28	cattle	0.112	negative	negative	negative	negative	Location 28	unknown	National Reference Laboratory for Chlamydiosis			positive for C. psittaci
1516 S+31	cattle	0.118	negative	negative	negative	negative	Location 28	unknown	National Reference Laboratory for Chlamydiosis			positive for C. psittaci
1516 S+35	cattle	0.073	negative	negative	negative	negative	Location 28	unknown	National Reference Laboratory for Chlamydiosis			positive for C. psittaci
1522 S+28	cattle	0.1355	negative	negative	negative	negative	Location 30	unknown	National Reference Laboratory for Chlamydiosis			positive for C. psittaci
1522 S+31	cattle	0.116	negative	negative	negative	negative	Location 30	unknown	National Reference Laboratory for Chlamydiosis			positive for C. psittaci
1522 S+35	cattle	0.146	negative	negative	negative	negative	Location 30	unknown	National Reference Laboratory for Chlamydiosis			positive for C. psittaci
20QC0044	cattle	0.11	negative	negative	not tested	not tested	Location 35	Northern Germany	outbreak			not tested
20QC0045	cattle	0.2895	positive	positive	not tested	not tested	Location 35	Northern Germany	outbreak	true positive case		not tested
20QC0046	cattle	0.226	positive	negative	not tested	not tested	Location 35	Northern Germany	outbreak			not tested
20QC0047	cattle	0.2245	positive	positive	not tested	not tested	Location 35	Northern Germany	outbreak	true positive case		not tested
20QC0048	cattle	0.274	positive	negative	not tested	not tested	Location 35	Northern Germany	outbreak			not tested
20QC0049	cattle	0.216	positive	positive	not tested	not tested	Location 35	Northern Germany	outbreak	true positive case		not tested
20QC0050	cattle	0.364	positive	positive	not tested	not tested	Location 35	Northern Germany	outbreak	true positive case		not tested
20QC0051	cattle	0.143	negative	negative	not tested	not tested	Location 35	Northern Germany	outbreak			not tested
20QC0052	cattle	0.1705	negative	positive	not tested	not tested	Location 35	Northern Germany	outbreak	true positive case		not tested
20QC0054	cattle	0.273	positive	positive	not tested	not tested	Location 35	Northern Germany	outbreak	true positive case		not tested
20QC0055	cattle	0.184	positive	positive	not tested	not tested	Location 35	Northern Germany	outbreak	true positive case		not tested
20QC0056	cattle	0.137	negative	negative	not tested	not tested	Location 35	Northern Germany	outbreak			not tested
20QC0057	cattle	0.2195	positive	positive	not tested	not tested	Location 35	Northern Germany	outbreak	true positive case		not tested
20QC0058	cattle	0.1275	negative	positive	not tested	not tested	Location 35	Northern Germany	outbreak	true positive case		not tested
20QC0059	cattle	0.151	negative	negative	not tested	not tested	Location 35	Northern Germany	outbreak			not tested
20QC0060	cattle	0.1815	positive	positive	not tested	not tested	Location 35	Northern Germany	outbreak	true positive case		not tested
20QC0061	cattle	0.202	positive	negative	not tested	not tested	Location 35	Northern Germany	outbreak			not tested
20QC0062	cattle	0.168	negative	negative	not tested	not tested	Location 35	Northern Germany	outbreak			not tested
20QC0063	cattle	0.133	negative	negative	not tested	not tested	Location 35	Northern Germany	outbreak			not tested
20QC0064	cattle	0.144	negative	positive	not tested	not tested	Location 35	Northern Germany	outbreak	true positive case		not tested
20QC0065	cattle	0.203	positive	positive	not tested	not tested	Location 35	Northern Germany	outbreak	true positive case		not tested
20QC0066	cattle	0.118	negative	positive	not tested	not tested	Location 35	Northern Germany	outbreak	true positive case		not tested
20QC0067	cattle	0.2275	positive	positive	not tested	not tested	Location 35	Northern Germany	outbreak	true positive case		not tested
20QC0068	cattle	0.2655	positive	positive	not tested	not tested	Location 35	Northern Germany	outbreak	true positive case		not tested
20QC0069	cattle	0.189	positive	positive	not tested	not tested	Location 35	Northern Germany	outbreak	true positive case		not tested
20QC0070	cattle	0.183	positive	positive	not tested	not tested	Location 35	Northern Germany	outbreak	true positive case		not tested
20QC0071	cattle	0.133	negative	positive	not tested	not tested	Location 35	Northern Germany	outbreak	true positive case		not tested
20QC0072	cattle	0.139	negative	positive	not tested	not tested	Location 35	Northern Germany	outbreak	true positive case		not tested
20QC0073	cattle	0.266	positive	positive	not tested	not tested	Location 35	Northern Germany	outbreak	true positive case		not tested
20QC0074	cattle	0.1695	negative	negative	not tested	not tested	Location 35	Northern Germany	outbreak			not tested
20QC0075	cattle	0.234	positive	negative	not tested	not tested	Location 35	Northern Germany	outbreak			not tested
20QC0076	cattle	0.1865	positive	positive	not tested	not tested	Location 35	Northern Germany	outbreak	true positive case		not tested
20QC0077	cattle	0.136	negative	negative	not tested	not tested	Location 35	Northern Germany	outbreak			not tested
20QC0078	cattle	0.2785	positive	positive	not tested	not tested	Location 35	Northern Germany	outbreak	true positive case		not tested
20QC0079	cattle	0.252	positive	positive	not tested	not tested	Location 35	Northern Germany	outbreak	true positive case		not tested
20QC0080	cattle	0.2115	positive	positive	not tested	not tested	Location 35	Northern Germany	outbreak	true positive case		not tested
20QC0081	cattle	0.2	positive	positive	not tested	not tested	Location 35	Northern Germany	outbreak	true positive case		not tested
20QC0082	cattle	0.289	positive	positive	not tested	not tested	Location 35	Northern Germany	outbreak	true positive case		not tested
20QC0084	cattle	0.195	positive	negative	not tested	not tested	Location 35	Northern Germany	outbreak			not tested
20QC0085	cattle	0.1795	negative	negative	not tested	not tested	Location 35	Northern Germany	outbreak			not tested
20QC0086	cattle	0.2075	positive	positive	not tested	not tested	Location 35	Northern Germany	outbreak	true positive case		not tested
20QC0087	cattle	0.207	positive	positive	not tested	not tested	Location 35	Northern Germany	outbreak	true positive case		not tested
20QC0088	cattle	0.166	negative	negative	not tested	not tested	Location 35	Northern Germany	outbreak			not tested
20QC0089	cattle	0.239	positive	negative	not tested	not tested	Location 35	Northern Germany	outbreak			not tested
17QC0197	cattle	0.1415	negative	negative	negative	negative	Location 33	Central Germany	apparently healthy herd			not tested
17QC0198	cattle	0.104	negative	negative	negative	negative	Location 33	Central Germany	apparently healthy herd			not tested
17QC0199	cattle	0.1105	negative	negative	negative	negative	Location 33	Central Germany	apparently healthy herd			not tested
14QC2274	cattle	0.2935	positive	positive	positive	positive	Location 27, 2010	Southern Germany	outbreak	true positive case		not tested
14QC2275	cattle	0.149	negative	negative	negative	negative	Location 27, 2010	Southern Germany	outbreak			not tested
14QC2276	cattle	0.156	negative	positive	positive	positive	Location 27, 2010	Southern Germany	outbreak	true positive case		not tested
14QC2277	cattle	0.1855	positive	positive	positive	positive	Location 27, 2010	Southern Germany	outbreak	true positive case		not tested
14QC2278	cattle	0.4095	positive	positive	positive	positive	Location 27, 2010	Southern Germany	outbreak	true positive case		not tested
14QC2279	cattle	0.383	positive	positive	positive	positive	Location 27, 2010	Southern Germany	outbreak	true positive case		not tested
14QC2280	cattle	0.5655	positive	positive	positive	positive	Location 27, 2010	Southern Germany	outbreak	true positive case		not tested
14QC2281	cattle	0.4425	positive	positive	positive	positive	Location 27, 2010	Southern Germany	outbreak	true positive case		not tested
14QC2282	cattle	0.473	positive	positive	positive	positive	Location 27, 2010	Southern Germany	outbreak	true positive case		not tested
14QC2283	cattle	0.542	positive	positive	positive	positive	Location 27, 2010	Southern Germany	outbreak	true positive case		not tested
14QC2284	cattle	0.3485	positive	positive	positive	positive	Location 27, 2010	Southern Germany	outbreak	true positive case		not tested
14QC1961	cattle	0.132	negative	positive	positive	positive	Location 26, 2014	Southern Germany	outbreak	true positive case	qPCR positive	not tested
14QC1962	cattle	0.244	positive	positive	positive	positive	Location 26, 2014	Southern Germany	outbreak		qPCR negative	not tested
14QC1963	cattle	0.274	positive	positive	positive	positive	Location 26, 2014	Southern Germany	outbreak	true positive case	qPCR positive	not tested
14QC1965	cattle	0.1665	negative	positive	uncertain	positive	Location 26, 2014	Southern Germany	outbreak		qPCR negative	not tested
14QC1967	cattle	0.1905	positive	positive	positive	positive	Location 26, 2014	Southern Germany	outbreak	true positive case	qPCR positive	not tested
14QC1968	cattle	0.2425	positive	positive	positive	positive	Location 26, 2014	Southern Germany	outbreak	true positive case	qPCR positive	not tested
14QC1969	cattle	0.225	positive	positive	positive	positive	Location 26, 2014	Southern Germany	outbreak	true positive case	qPCR positive	not tested
14QC1970	cattle	0.2495	positive	positive	positive	positive	Location 26, 2014	Southern Germany	outbreak		qPCR negative	not tested
14E1672	cattle	0.1335	negative	positive	not tested	not tested	Location 24, 2018	unknown	apparently healthy herd			not tested
14E1673	cattle	0.152	negative	positive	not tested	not tested	Location 24, 2018	unknown	apparently healthy herd			not tested
14E1675	cattle	0.169	negative	positive	not tested	not tested	Location 24, 2018	unknown	apparently healthy herd			not tested
14E1677	cattle	0.1345	negative	positive	not tested	not tested	Location 24, 2018	unknown	apparently healthy herd			not tested
14E1679	cattle	0.1635	negative	positive	not tested	not tested	Location 24, 2018	unknown	apparently healthy herd			not tested
14E1681	cattle	0.148	negative	positive	not tested	not tested	Location 24, 2018	unknown	apparently healthy herd			not tested
14E1683	cattle	0.159	negative	positive	not tested	not tested	Location 24, 2018	unknown	apparently healthy herd			not tested
14E1685	cattle	0.145	negative	positive	not tested	not tested	Location 24, 2018	unknown	apparently healthy herd			not tested
14E1691	cattle	0.2535	positive	positive	not tested	not tested	Location 24, 2018	unknown	apparently healthy herd			not tested
14E1695	cattle	0.251	positive	positive	not tested	not tested	Location 24, 2018	unknown	apparently healthy herd			not tested
14E1697	cattle	0.3445	positive	positive	not tested	not tested	Location 24, 2018	unknown	apparently healthy herd			not tested
14E1699	cattle	0.159	negative	positive	not tested	not tested	Location 24, 2018	unknown	apparently healthy herd			not tested
14E1701	cattle	0.2645	positive	positive	not tested	not tested	Location 24, 2018	unknown	apparently healthy herd			not tested
14E1703	cattle	0.256	positive	positive	not tested	not tested	Location 24, 2018	unknown	apparently healthy herd			not tested
14E1705	cattle	0.2445	positive	positive	not tested	not tested	Location 24, 2018	unknown	apparently healthy herd			not tested
14E1707	cattle	0.245	positive	positive	not tested	not tested	Location 24, 2018	unknown	apparently healthy herd			not tested
14E1709	cattle	0.2615	positive	positive	not tested	not tested	Location 24, 2018	unknown	apparently healthy herd			not tested
14E1711	cattle	0.296	positive	positive	not tested	not tested	Location 24, 2018	unknown	apparently healthy herd			not tested
14E1713	cattle	0.299	positive	positive	not tested	not tested	Location 24, 2018	unknown	apparently healthy herd			not tested
14E1715	cattle	0.2905	positive	positive	not tested	not tested	Location 24, 2018	unknown	apparently healthy herd			not tested
14E1717	cattle	0.271	positive	positive	not tested	not tested	Location 24, 2018	unknown	apparently healthy herd			not tested
14E1719	cattle	0.216	positive	positive	not tested	not tested	Location 24, 2018	unknown	apparently healthy herd			not tested
18QC0003	cattle	0.2025	positive	positive	positive	positive	Location 34	Central Germany	no further particulars			not tested
18QC0004	cattle	0.16	negative	positive	positive	negative	Location 34	Central Germany	no further particulars			not tested
18QC0005	cattle	0.1835	positive	positive	positive	negative	Location 34	Central Germany	no further particulars			not tested
18QC0006	cattle	0.2575	positive	positive	positive	uncertain	Location 34	Central Germany	no further particulars			not tested
18QC0007	cattle	0.156	negative	positive	positive	negative	Location 34	Central Germany	no further particulars			not tested
18QC0008	cattle	0.1875	positive	positive	negative	positive	Location 34	Central Germany	no further particulars			not tested
18QC0009	cattle	0.22	positive	positive	positive	positive	Location 34	Central Germany	no further particulars			not tested
18QC0010	cattle	0.148	negative	positive	negative	positive	Location 34	Central Germany	no further particulars			not tested
18QC0011	cattle	0.174	negative	positive	uncertain	negative	Location 34	Central Germany	no further particulars			not tested
18QC0014	cattle	0.1275	negative	positive	positive	positive	Location 34	Central Germany	no further particulars			not tested
18QC0015	cattle	0.189	positive	positive	positive	positive	Location 34	Central Germany	no further particulars			not tested
18QC0016	cattle	0.2065	positive	positive	positive	uncertain	Location 34	Central Germany	no further particulars			not tested
18QC0017	cattle	0.1925	positive	positive	negative	negative	Location 34	Central Germany	no further particulars			not tested
18QC0018	cattle	0.1815	positive	positive	positive	negative	Location 34	Central Germany	no further particulars			not tested
18QC0019	cattle	0.1685	negative	positive	positive	negative	Location 34	Central Germany	no further particulars			not tested
18QC0020	cattle	0.1665	negative	positive	positive	positive	Location 34	Central Germany	no further particulars			not tested
18QC0021	cattle	0.1685	negative	positive	positive	positive	Location 34	Central Germany	no further particulars			not tested
18QC0022	cattle	0.19	positive	positive	positive	positive	Location 34	Central Germany	no further particulars			not tested
18QC0023	cattle	0.187	positive	positive	positive	uncertain	Location 34	Central Germany	no further particulars			not tested
18QC0024	cattle	0.11	negative	positive	uncertain	positive	Location 34	Central Germany	no further particulars			not tested	excluded because of lowest optical density of all positive sera
18QC0025	cattle	0.1285	negative	positive	uncertain	positive	Location 34	Central Germany	no further particulars			not tested
18QC0026	cattle	0.126	negative	positive	negative	uncertain	Location 34	Central Germany	no further particulars			not tested
18QC0027	cattle	0.1585	negative	positive	positive	uncertain	Location 34	Central Germany	no further particulars			not tested
18QC0028	cattle	0.1525	negative	positive	positive	positive	Location 34	Central Germany	no further particulars			not tested
18QC0029	cattle	0.156	negative	positive	positive	positive	Location 34	Central Germany	no further particulars			not tested
18QC0030	cattle	0.1595	negative	positive	positive	positive	Location 34	Central Germany	no further particulars			not tested
18QC0031	cattle	0.135	negative	positive	positive	positive	Location 34	Central Germany	no further particulars			not tested
070306 J 4277	cattle	0.2435	positive	negative	negative	negative	Location 23	unknown	National Reference Laboratory for Paratuberculosis			positive for M. avium ssp. paratuberculosis
070306 J 4279	cattle	0.3165	positive	positive	positive	positive	Location 23	unknown	National Reference Laboratory for Paratuberculosis			positive for M. avium ssp. paratuberculosis
070306 J 4280	cattle	0.1925	positive	negative	negative	negative	Location 23	unknown	National Reference Laboratory for Paratuberculosis			positive for M. avium ssp. paratuberculosis
070306 J 4282	cattle	0.4205	positive	positive	positive	positive	Location 23	unknown	National Reference Laboratory for Paratuberculosis			positive for M. avium ssp. paratuberculosis
070306 J 4284	cattle	0.2205	positive	positive	positive	positive	Location 23	unknown	National Reference Laboratory for Paratuberculosis			positive for M. avium ssp. paratuberculosis
070306 J 4323	cattle	0.2345	positive	positive	positive	negative	Location 23	unknown	National Reference Laboratory for Paratuberculosis			positive for M. avium ssp. paratuberculosis
070306 J 4324	cattle	0.2895	positive	positive	positive	positive	Location 23	unknown	National Reference Laboratory for Paratuberculosis			positive for M. avium ssp. paratuberculosis
070306 J 4325	cattle	0.256	positive	positive	positive	uncertain	Location 23	unknown	National Reference Laboratory for Paratuberculosis			positive for M. avium ssp. paratuberculosis
070306 J 4327	cattle	0.251	positive	positive	positive	positive	Location 23	unknown	National Reference Laboratory for Paratuberculosis			positive for M. avium ssp. paratuberculosis
070306 J 4330	cattle	0.2745	positive	negative	negative	negative	Location 23	unknown	National Reference Laboratory for Paratuberculosis			positive for M. avium ssp. paratuberculosis	excluded because of highest optical density of all negative sera
4379 +10	cattle	0.1915	positive	positive	positive	negative	Location 36	unknown	National Reference Laboratory for Chlamydiosis			positive for Parachlamydia spp.
4379 +14	cattle	0.198	positive	positive	positive	negative	Location 36	unknown	National Reference Laboratory for Chlamydiosis			positive for Parachlamydia spp.
4380 +10	cattle	0.1865	positive	positive	positive	positive	Location 36	unknown	National Reference Laboratory for Chlamydiosis			positive for Parachlamydia spp.
4380 +14	cattle	0.254	positive	positive	positive	positive	Location 36	unknown	National Reference Laboratory for Chlamydiosis			positive for Parachlamydia spp.
4381 +10	cattle	0.2475	positive	positive	positive	positive	Location 36	unknown	National Reference Laboratory for Chlamydiosis			positive for Parachlamydia spp.
4381 +14	cattle	0.253	positive	positive	positive	uncertain	Location 36	unknown	National Reference Laboratory for Chlamydiosis			positive for Parachlamydia spp.
4381/S+7	cattle	0.1865	positive	positive	not tested	not tested	Location 36	unknown	National Reference Laboratory for Chlamydiosis			positive for Parachlamydia spp.
4382/S+14	cattle	0.2275	positive	positive	not tested	not tested	Location 36	unknown	National Reference Laboratory for Chlamydiosis			positive for Parachlamydia spp.
4383 +10	cattle	0.1945	positive	positive	positive	uncertain	Location 36	unknown	National Reference Laboratory for Chlamydiosis			positive for Parachlamydia spp.
4383 +14	cattle	0.1855	positive	positive	positive	negative	Location 36	unknown	National Reference Laboratory for Chlamydiosis			positive for Parachlamydia spp.
4386 +10	cattle	0.2435	positive	positive	positive	uncertain	Location 36	unknown	National Reference Laboratory for Chlamydiosis			positive for Parachlamydia spp.
4386 +14	cattle	0.268	positive	positive	positive	negative	Location 36	unknown	National Reference Laboratory for Chlamydiosis			positive for Parachlamydia spp.
4387 +10	cattle	0.2265	positive	negative	negative	negative	Location 36	unknown	National Reference Laboratory for Chlamydiosis			positive for Parachlamydia spp.
4387 +7	cattle	0.2175	positive	negative	negative	negative	Location 36	unknown	National Reference Laboratory for Chlamydiosis			positive for Parachlamydia spp.
1516/S+10	cattle	0.1035	negative	negative	not tested	not tested	Location 29	unknown	National Reference Laboratory for Chlamydiosis			positive for Parachlamydia spp.
1516/S+14	cattle	0.107	negative	negative	not tested	not tested	Location 29	unknown	National Reference Laboratory for Chlamydiosis			positive for Parachlamydia spp.
1516/S+17	cattle	0.1105	negative	negative	not tested	not tested	Location 29	unknown	National Reference Laboratory for Chlamydiosis			positive for Parachlamydia spp.
1516/S+21	cattle	0.116	negative	negative	not tested	not tested	Location 29	unknown	National Reference Laboratory for Chlamydiosis			positive for Parachlamydia spp.
1516/S+24	cattle	0.109	negative	negative	not tested	not tested	Location 29	unknown	National Reference Laboratory for Chlamydiosis			positive for Parachlamydia spp.
1516/S+S	cattle	0.0855	negative	negative	not tested	not tested	Location 29	unknown	National Reference Laboratory for Chlamydiosis			positive for Parachlamydia spp.
1522/S+10	cattle	0.1855	positive	negative	not tested	not tested	Location 31	unknown	National Reference Laboratory for Chlamydiosis			positive for Parachlamydia spp.
1522/S+14	cattle	0.147	negative	negative	not tested	not tested	Location 31	unknown	National Reference Laboratory for Chlamydiosis			positive for Parachlamydia spp.
1522/S+17	cattle	0.172	negative	negative	not tested	not tested	Location 31	unknown	National Reference Laboratory for Chlamydiosis			positive for Parachlamydia spp.
1522/S+21	cattle	0.209	positive	negative	not tested	not tested	Location 31	unknown	National Reference Laboratory for Chlamydiosis			positive for Parachlamydia spp.
1522/S-S	cattle	0.1495	negative	negative	not tested	not tested	Location 31	unknown	National Reference Laboratory for Chlamydiosis			positive for Parachlamydia spp.
